# Supplementary material for: N-Heterocyclic carbene silver(i), palladium(ii) and mercury(ii) complexes: synthesis, structural studies and catalytic activity
Source: Royal Society of Chemistry journal article supplement (doi:10.1039/c2ce25365h), 2012-01-01
Supplement: c2ce25365h.pdf [file c2ce25365h.pdf]

Manuscript ID CE-ART-03-2012-025365

Supplementary material

CCDC 818678-818682 for **1-5** and 794736-794738 for **6-8** contain the supplementary crystallographic data. These data can be obtained free of charge via <http://www.ccdc.cam.ac.uk/conts/retrieving.html>, or from the Cambridge Crystallographic Data Centre, 12 Union Road, Cambridge, CB2 1EZ, UK; fax: (+44) 1223-336-033; or e-mail: [deposit@ccdc.cam.ac.uk](mailto:deposit@ccdc.cam.ac.uk). Supplementary data and Figures associated with this article can be found, in the online version.

**Table S1** Dihedral angles (°) between two benzimidazole rings (**A**) on the same ligand, dihedral angles (°) between benzimidazole ring and adjacent benzene ring on the same ligand (**B**), and dihedral angles (°) between two benzene rings on the same ligand (**C**) for complexes **1-5**

| Complexes | A    | B          | C    |
|-----------|------|------------|------|
| <b>1</b>  | 14.1 | 80.9, 78.5 | 82.1 |
| <b>2</b>  | 13.1 | 79.1, 88.5 | 49.5 |
| <b>3</b>  | 12.5 | 80.1, 77.4 | 88.1 |
| <b>4</b>  | 2.6  | 80.0, 81.1 | 80.2 |
| <b>5</b>  | 2.2  | 77.3, 76.7 | 68.8 |

**Table S2** Dihedral angles (°) between two benzimidazole rings (**A**) on the same ligand, dihedral angles (°) between the mesitylene plane and two benzimidazole rings on the same ligand (**B**), and dihedral angles between benzimidazole ring and adjacent benzene ring of benzyl group (or pyridine ring) (**C**) for complexes **6-8**

| Compounds | A    | B          | C          |
|-----------|------|------------|------------|
| <b>6</b>  | 13.1 | 71.1, 80.3 | -          |
| <b>7</b>  | 6.6  | 88.1, 88.1 | 74.4, 67.7 |
| <b>8</b>  | 10.5 | 80.8, 89.0 | 73.4, 78.3 |

**Table S3** Distances (Å) of  $\pi$ - $\pi$  interactions, and distances (Å) and angles (°) of C-H... $\pi$  contacts for **1** and **3-7**

| Complexes | $\pi$ - $\pi$             |                          | C-H... $\pi$ |              |
|-----------|---------------------------|--------------------------|--------------|--------------|
|           | face-to-face              | center-to-center         | H... $\pi$   | C-H... $\pi$ |
| <b>1</b>  | 3.380(2) (benzene)        | 3.761(2) (benzene)       | 2.521(1)     | 150.2(5)     |
|           | 3.646(2) (benzimidazole)  | 3.938(2) (benzimidazole) |              |              |
| <b>3</b>  | 3.405(1) (benzene)        | 3.679(1) (benzene)       | 2.751(1)     | 144.7(4)     |
|           | 3.342(1) (benzimidazole)  | 3.507(1) (benzimidazole) |              |              |
| <b>4</b>  | 3.409(3) (benzimidazole)  | 3.672(3) (benzimidazole) | –            | –            |
| <b>5</b>  | 3.402(77) (benzimidazole) | 3.672(1) (benzimidazole) | –            | –            |
| <b>6</b>  | –                         | –                        | 3.376(3)     | 137.2(7)     |
| <b>7</b>  | 3.613(3) (benzimidazole)  | 4.086(3) (benzimidazole) | –            | –            |
|           | 3.422(3) (benzene)        | 3.719(3) (benzene)       |              |              |

**Table S4** H-Bonding Geometry (Å, °) for **2** and **6-8**

|          | D-H...A                          | D-H     | H...A    | D...A    | D-H...A  |
|----------|----------------------------------|---------|----------|----------|----------|
| <b>2</b> | C(38)-H(38A)...Cl(3)             | 0.96(1) | 2.674(1) | 3.594(6) | 161.0(4) |
| <b>6</b> | C(8)-H(8)...I(5) <sup>i</sup>    | 0.93(1) | 2.998(3) | 3.787(5) | 143.7(1) |
|          | C(38)-H(38)...I(6) <sup>i</sup>  | 0.93(1) | 2.661(2) | 3.495(3) | 149.7(1) |
| <b>7</b> | C(4)-H(4)...Br(3) <sup>i</sup>   | 0.97(1) | 2.949(1) | 3.831(2) | 158.8(6) |
|          | C(24)-H(24)...Br(2)              | 0.93(1) | 2.908(1) | 3.781(2) | 150.3(6) |
|          | C(6)-H(6)...N(6)                 | 0.97(1) | 2.487(1) | 3.452(2) | 173.1(6) |
| <b>8</b> | C(35)-H(35)...O(1) <sup>i</sup>  | 0.93(1) | 2.369(2) | 3.124(2) | 138.2(1) |
|          | C(12)-H(12)...O(2) <sup>ii</sup> | 0.93(1) | 2.500(2) | 3.420(3) | 170.0(1) |

Symmetry code: i: -2-x, 2-y, 1-z for **6**. i: x, 1+y, z for **7**. i: 1+x, y, z; ii: 1-x, 1-y, -z for **8**.

**Table S5** The reaction of ligand **L<sup>1</sup>H<sub>2</sub>** with Ag(OAc)<sup>[a]</sup>

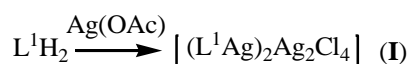

| L <sup>1</sup> H <sub>2</sub> /Ag(OAc)<br>(equiv/equiv) | Entry | Time (h) | Temp. (°C) | Crude product <sup>[b]</sup> | Ag(OAc) yield (%) |
|---------------------------------------------------------|-------|----------|------------|------------------------------|-------------------|
| 1:1                                                     | 1     | 14       | 40         | <b>I</b>                     | 41                |
|                                                         | 2     | 16       | 40         | <b>I</b>                     | 64                |
|                                                         | 3     | 18       | 40         | <b>I</b>                     | 62                |
|                                                         | 4     | 18       | 25         | <b>I</b>                     | 50                |
| 1:2                                                     | 5     | 16       | 40         | <b>I</b>                     | 64                |
|                                                         | 6     | 16       | 40         | <b>I</b>                     | 61                |

|     |   |    |    |          |    |
|-----|---|----|----|----------|----|
| 1:3 | 7 | 16 | 40 | <b>I</b> | 62 |
|     | 8 | 16 | 40 | <b>I</b> | 63 |

[a] Reaction conditions: the solvent CH<sub>2</sub>Cl<sub>2</sub> in N<sub>2</sub>.

[b] Crude product was characterized by <sup>1</sup>H NMR, element analysis and melting point.

**Table S6** The reaction of ligand L<sup>2</sup>H<sub>2</sub> with Ag<sub>2</sub>O<sup>[a]</sup>

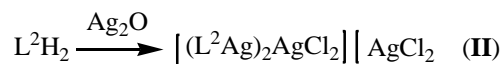

| L <sup>2</sup> H <sub>2</sub> /Ag <sub>2</sub> O<br>(equiv/equiv) | Entry | Time (h) | Temp. (°C) | Crude<br>product <sup>[b]</sup> | Ag <sub>2</sub> O<br>yield (%) |
|-------------------------------------------------------------------|-------|----------|------------|---------------------------------|--------------------------------|
| 1:1                                                               | 1     | 6        | 40         | <b>II</b>                       | 51                             |
|                                                                   | 2     | 8        | 40         | <b>II</b>                       | 64                             |
|                                                                   | 3     | 10       | 40         | <b>II</b>                       | 63                             |
|                                                                   | 4     | 10       | 25         | <b>II</b>                       | 48                             |
| 1:2                                                               | 5     | 8        | 40         | <b>II</b>                       | 61                             |
|                                                                   | 6     | 8        | 40         | <b>II</b>                       | 63                             |
| 1:3                                                               | 7     | 8        | 40         | <b>II</b>                       | 65                             |
|                                                                   | 8     | 8        | 40         | <b>II</b>                       | 63                             |

[a] Reaction conditions: the solvent CH<sub>2</sub>Cl<sub>2</sub> in N<sub>2</sub>.

[b] Crude product was characterized by <sup>1</sup>H NMR, element analysis and melting point.

**Table S7** The reaction of ligand L<sup>2</sup>H<sub>2</sub> with Ag(OAc)

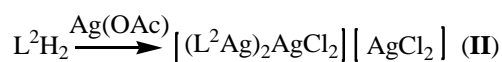

| L <sup>2</sup> H <sub>2</sub> /Ag(OAc)<br>(equiv/equiv) | Entry | Time (h) | Temp. (°C) | Crude<br>product <sup>[a]</sup> | Ag(OAc)<br>yield (%) |
|---------------------------------------------------------|-------|----------|------------|---------------------------------|----------------------|
| 1:1                                                     | 1     | 14       | 40         | <b>II</b>                       | 38                   |
|                                                         | 2     | 16       | 40         | <b>II</b>                       | 66                   |
|                                                         | 3     | 18       | 40         | <b>II</b>                       | 64                   |
|                                                         | 4     | 18       | 25         | <b>II</b>                       | 51                   |
| 1:2                                                     | 5     | 16       | 40         | <b>II</b>                       | 64                   |
|                                                         | 6     | 16       | 40         | <b>II</b>                       | 62                   |
| 1:3                                                     | 7     | 16       | 40         | <b>II</b>                       | 63                   |
|                                                         | 8     | 16       | 40         | <b>II</b>                       | 62                   |

[a] Reaction conditions: the solvent CH<sub>2</sub>Cl<sub>2</sub> in N<sub>2</sub>.

[b] Crude product was characterized by <sup>1</sup>H NMR, element analysis and melting point.
